# Supplementary material for: Polyionic liquid ionogels formed via hydrophobic association for flexible strain sensors
Source: Royal Society of Chemistry journal article supplement (doi:10.1039/d4tc00317a), 2024-01-01
Supplement: d4tc00317a1.pdf [file d4tc00317a1.pdf]

## Polyionic liquid ionogels formed via hydrophobic association for flexible strain sensors

**Table S1** Ingredients for the synthesis of Cho-AA VILs.

| Chemicals | content(g) |
|-----------|------------|
| AAc       | 0.7206     |
| EDC·HCl   | 1.9170     |
| NHS       | 0.2302     |
| Cho-Asp   | 2.3628     |
| Cho-Arg   | 2.7738     |
| Cho-Asn   | 2.3530     |

**Table S2** The formulations of Cho-Ax ionogels.

| Samples                | Cho-AA VILs(g) | AAm (g) | C <sub>18</sub> (uL) | BC (g) | SDS (g) | APS (uL) | TEMED (uL) | H <sub>2</sub> O (mL) |
|------------------------|----------------|---------|----------------------|--------|---------|----------|------------|-----------------------|
| Cho-Asp <sub>5%</sub>  | 0.20           | 1       | 110                  | 1      | 0.7     | 100      | 25         | 3                     |
| Cho-Asp <sub>10%</sub> | 0.41           | 1       | 110                  | 1      | 0.7     | 100      | 25         | 3                     |
| Cho-Asp <sub>15%</sub> | 0.61           | 1       | 110                  | 1      | 0.7     | 100      | 25         | 3                     |
| Cho-Arg <sub>5%</sub>  | 0.23           | 1       | 110                  | 1      | 0.7     | 100      | 25         | 3                     |
| Cho-Arg <sub>10%</sub> | 0.47           | 1       | 110                  | 1      | 0.7     | 100      | 25         | 3                     |
| Cho-Arg <sub>15%</sub> | 0.70           | 1       | 110                  | 1      | 0.7     | 100      | 25         | 3                     |
| Cho-Asn <sub>5%</sub>  | 0.20           | 1       | 110                  | 1      | 0.7     | 100      | 25         | 3                     |
| Cho-Asn <sub>10%</sub> | 0.41           | 1       | 110                  | 1      | 0.7     | 100      | 25         | 3                     |
| Cho-Asn <sub>15%</sub> | 0.61           | 1       | 110                  | 1      | 0.7     | 100      | 25         | 3                     |

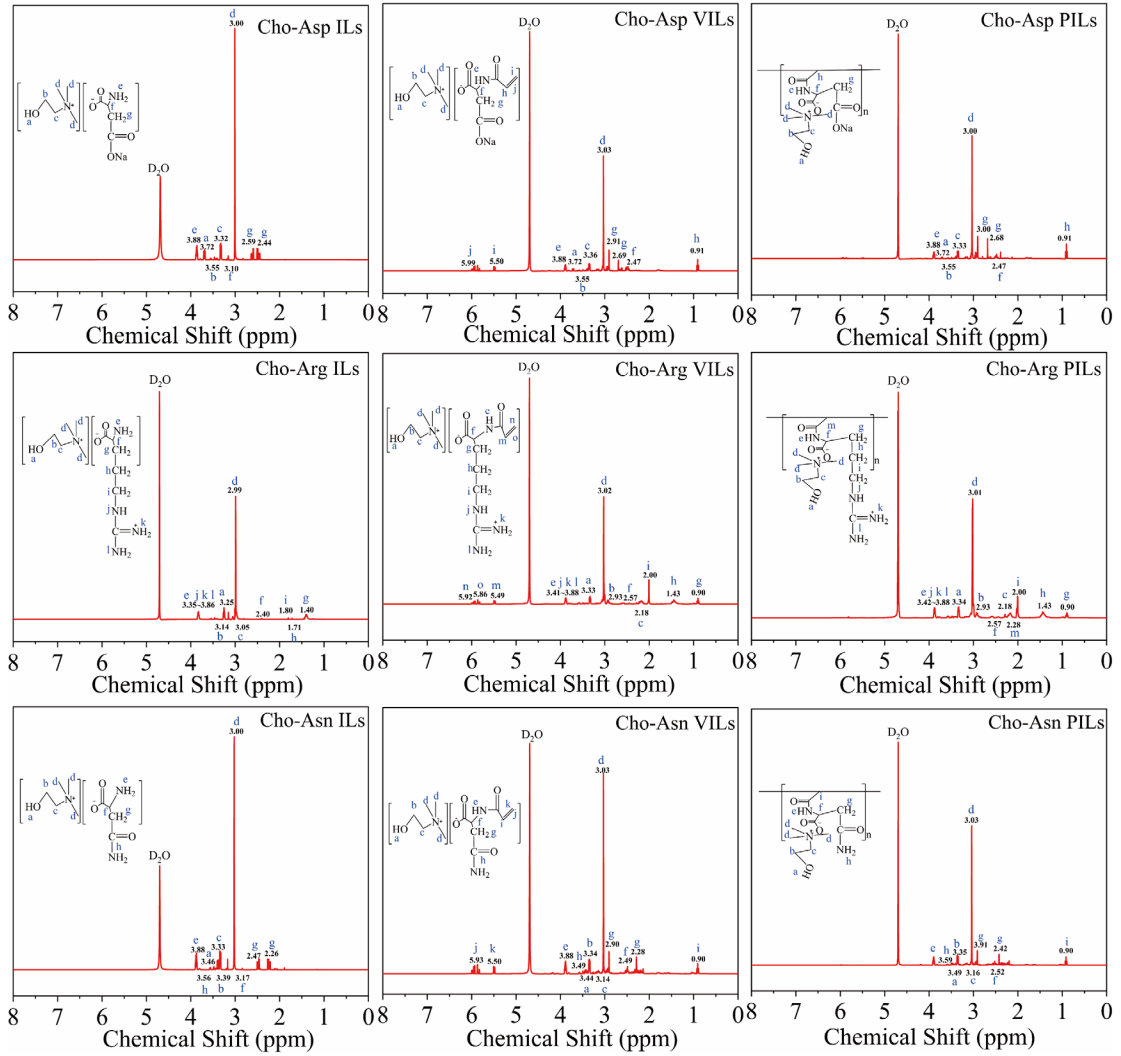

**Fig. S1**  $^1\text{H}$  NMR spectra of Cho-AA ILs, Cho-AA VILs and Cho-AA PILs.

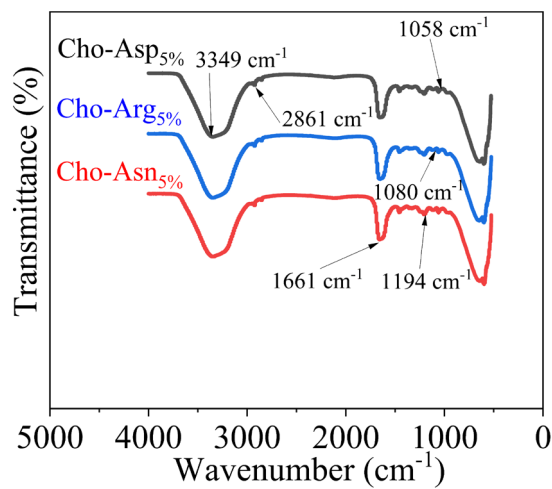

**Fig. S2** ATR-FTIR spectra of Cho-Ax ionogels.

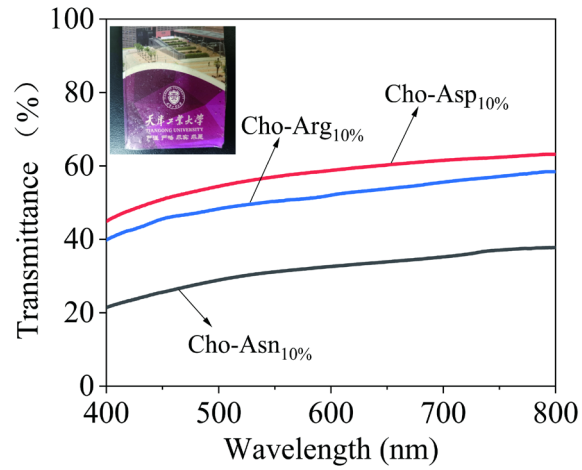

**Fig. S3** UV spectra of Cho-A<sub>10%</sub> ionogels.

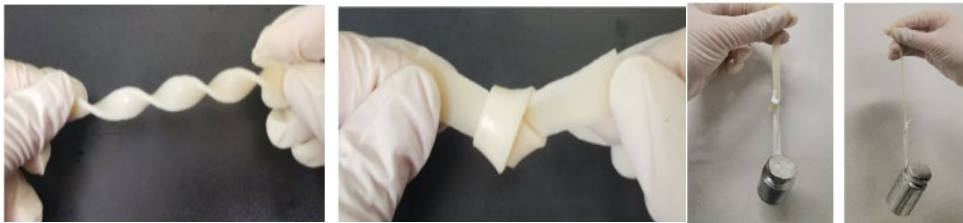

**Fig. S4** Cho-Asp<sub>10%</sub> ionogel twists, knots, and withstands 200 g and 500 g weights.

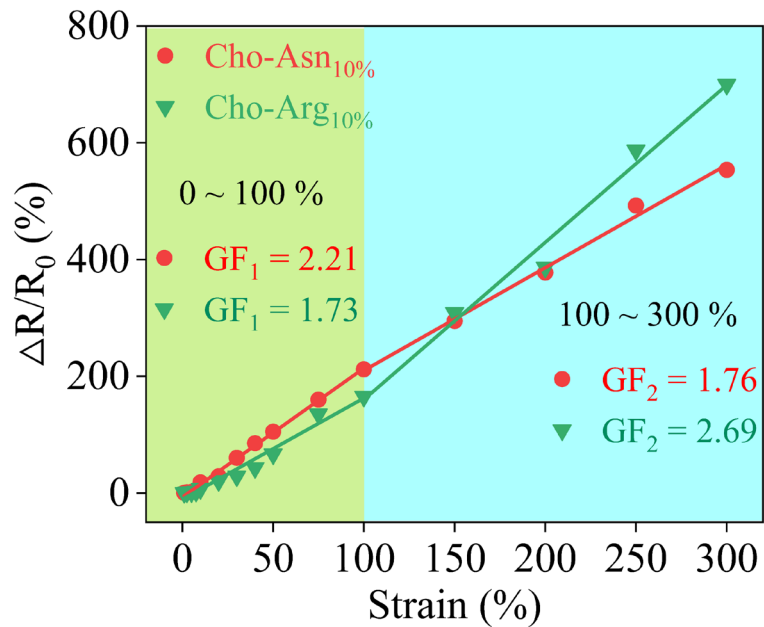

**Fig. S5** Gauge factor (GF) of Cho-A<sub>10%</sub> sensors at 0~300% of strain.

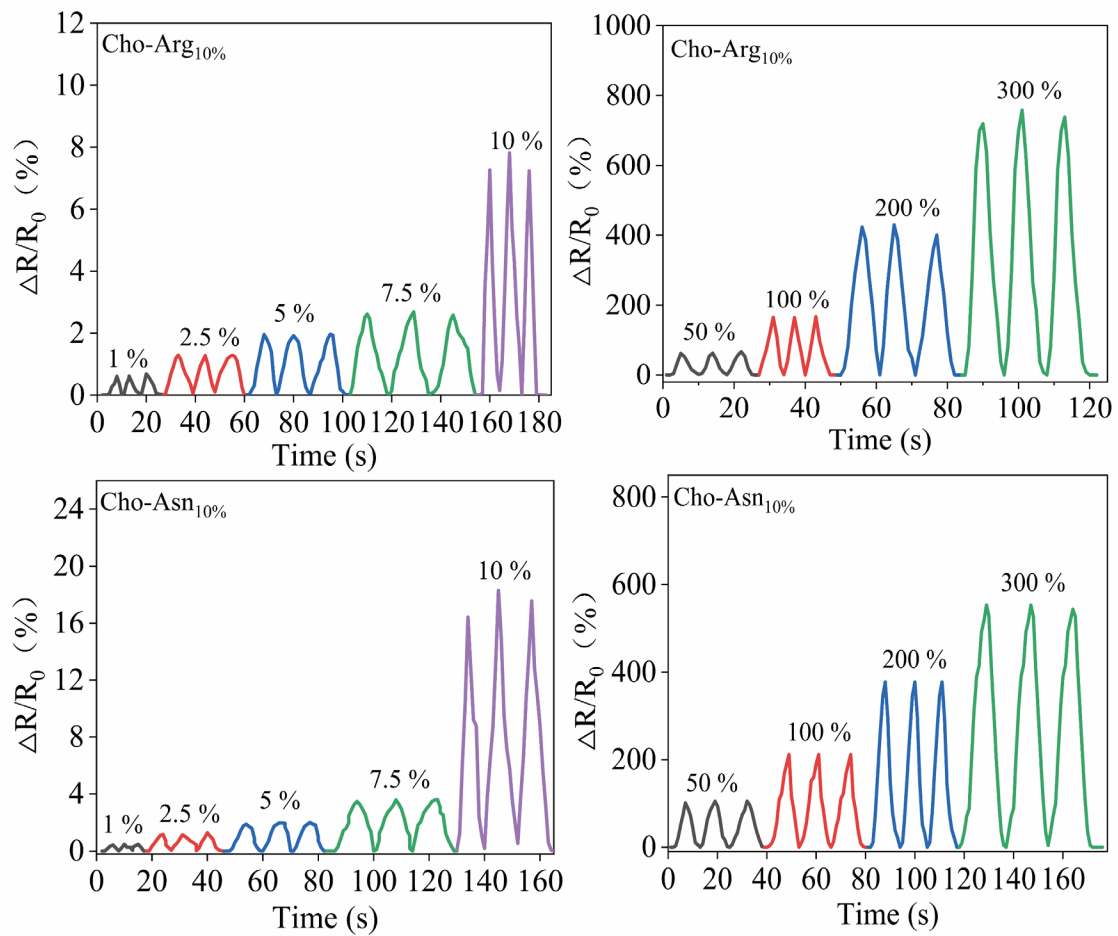

**Fig. S6** Relative resistance response of Cho-A<sub>10%</sub> sensors after cyclic stretching at small and large strains.

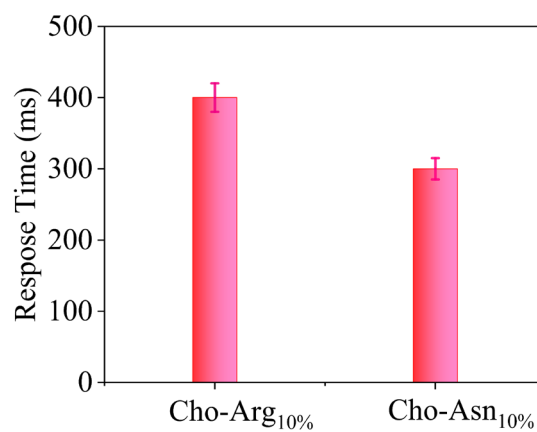

**Fig. S7** The response time of Cho-A<sub>10%</sub> sensors at 300% of strain.

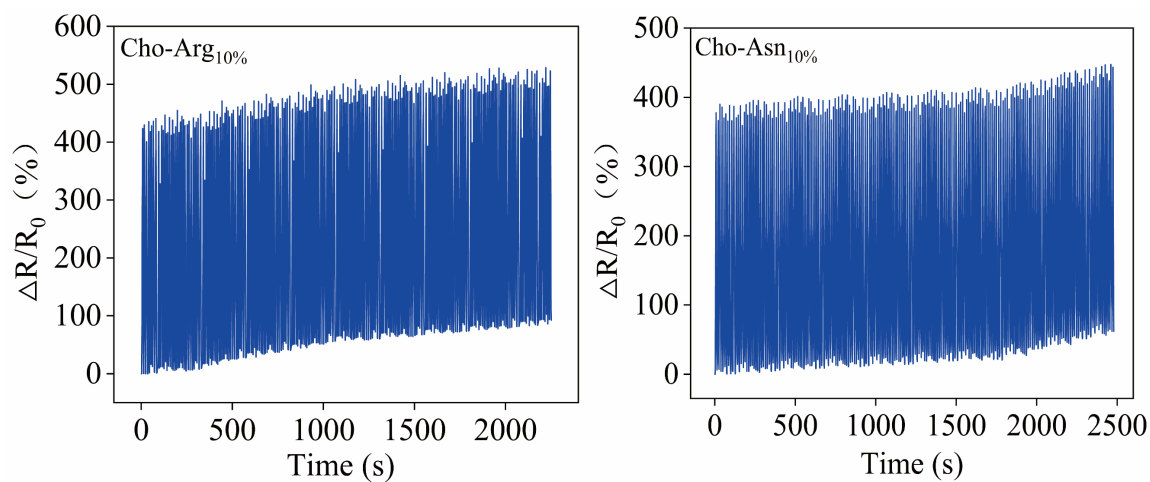

**Fig. S8** Relative resistance response of the Cho-Ax sensors to cyclic strain (200 %) for 200 cycles.

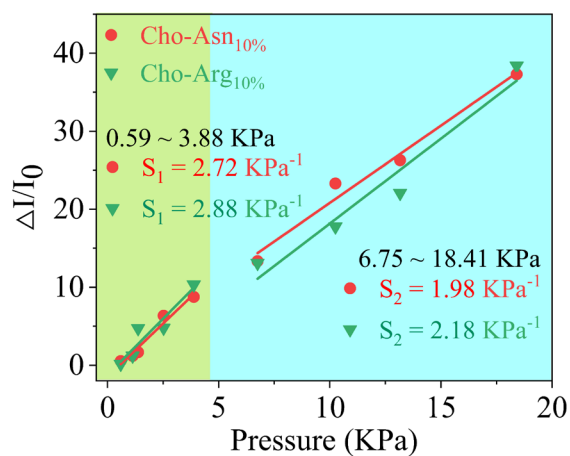

**Fig. S9** Pressure sensitivity ( $S$ ) of original and self-healing Cho-A<sub>10%</sub> sensors at low pressures (0.59 ~ 3.88 KPa) and high pressures (6.75 ~ 18.41 KPa).

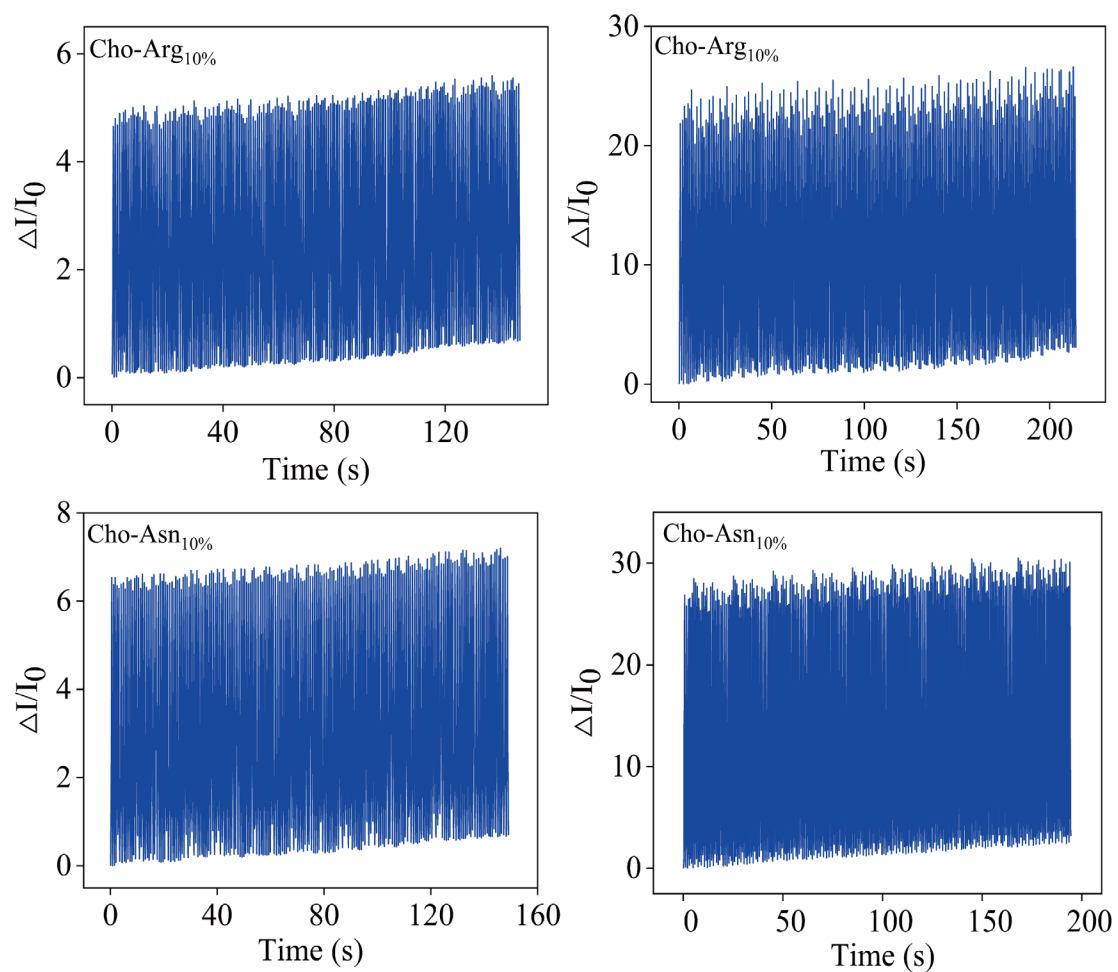

**Fig. S10** Relative current changes at low pressures (2.52 KPa) and high pressures (13.16 KPa) for 200 cycles of loading-unloading of Cho-A<sub>10%</sub> sensors.

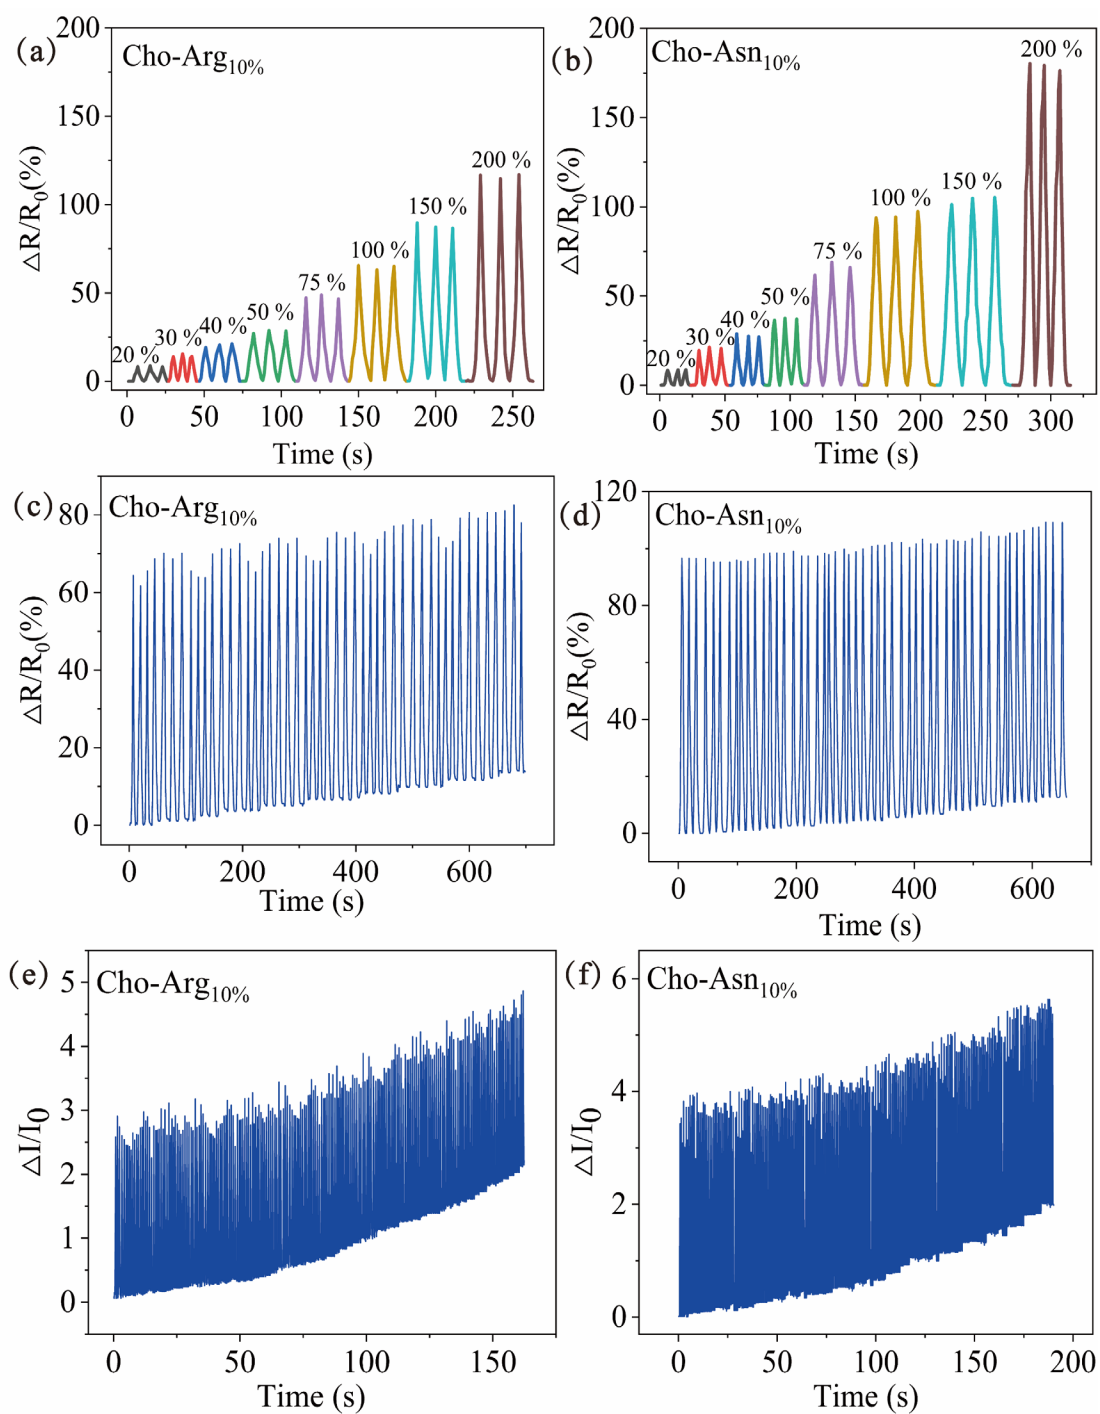

**Fig. S11** Relative resistance response of Cho-Arg<sub>10%</sub> (a) and Cho-Asn<sub>10%</sub> (b) ionogels under different strains from 20 % to 200 % at -20 °C. Relative resistance response of Cho-Arg<sub>10%</sub> (c) and Cho-Asn<sub>10%</sub> (d) ionogels to cyclic strain (100%) over 50 cycles at -20 °C. Relative current changes of Cho-Arg<sub>10%</sub> (e) and Cho-Asn<sub>10%</sub> (f) ionogels to cyclic pressure (13.16 KPa) over 200 cycles at -20 °C.
